# Supplementary material for: Rare-Earth-Metal (Nd3+, Ce3+ and Gd3+)-Doped CaF2: Nanoparticles for Multimodal Imaging in Biomedical Applications
Source: MDPI journal article supplement (doi:10.3390/pharmaceutics14122796), 2022-12-14
Supplement: s1 [file s1]

Supporting Information:

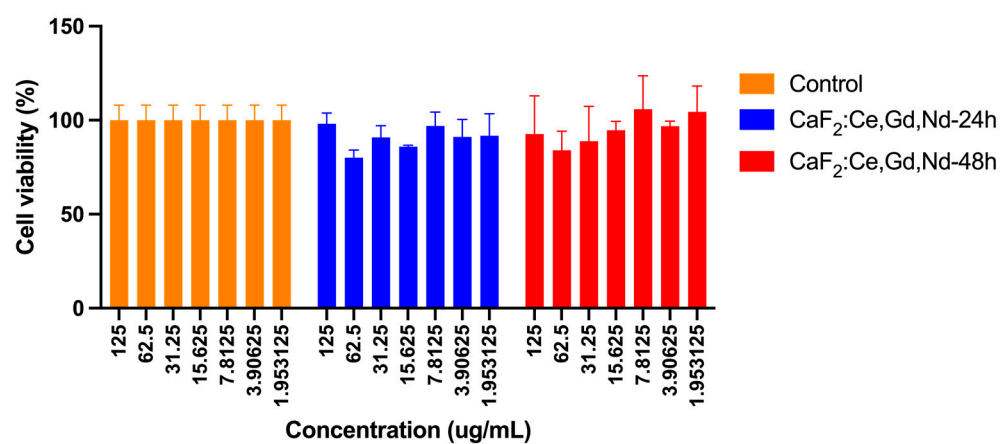

**Figure S1.** Cell viability. PBMCs were treated with CaF<sub>2</sub>: Ce, Gd, Nd NPs at varying concentrations (0–125 µg/mL) on PBMCs for 24 h and 48 h. Data represent the mean values ± SD from three independent experiments. Statistical significance was calculated using two-way ANOVA, by comparing experimental groups to control group.
